# Supplementary material for: Fluctuations in episodic and chronic migraine status over the course of 1 year: implications for diagnosis, treatment and clinical trial design
Source: PubMed Central journal article supplement (PMC5628086; doi:10.1186/s10194-017-0787-1), 2017-10-04

Supplementary Figure 1. Variability of Headache Day Frequency for Individuals with A. Persons with CM had baseline who remit in Wave 2 or Wave 3. B. Persons with CM at baseline who remit in Wave 2 C. Persons with EM at baseline CM during follow-up

A.

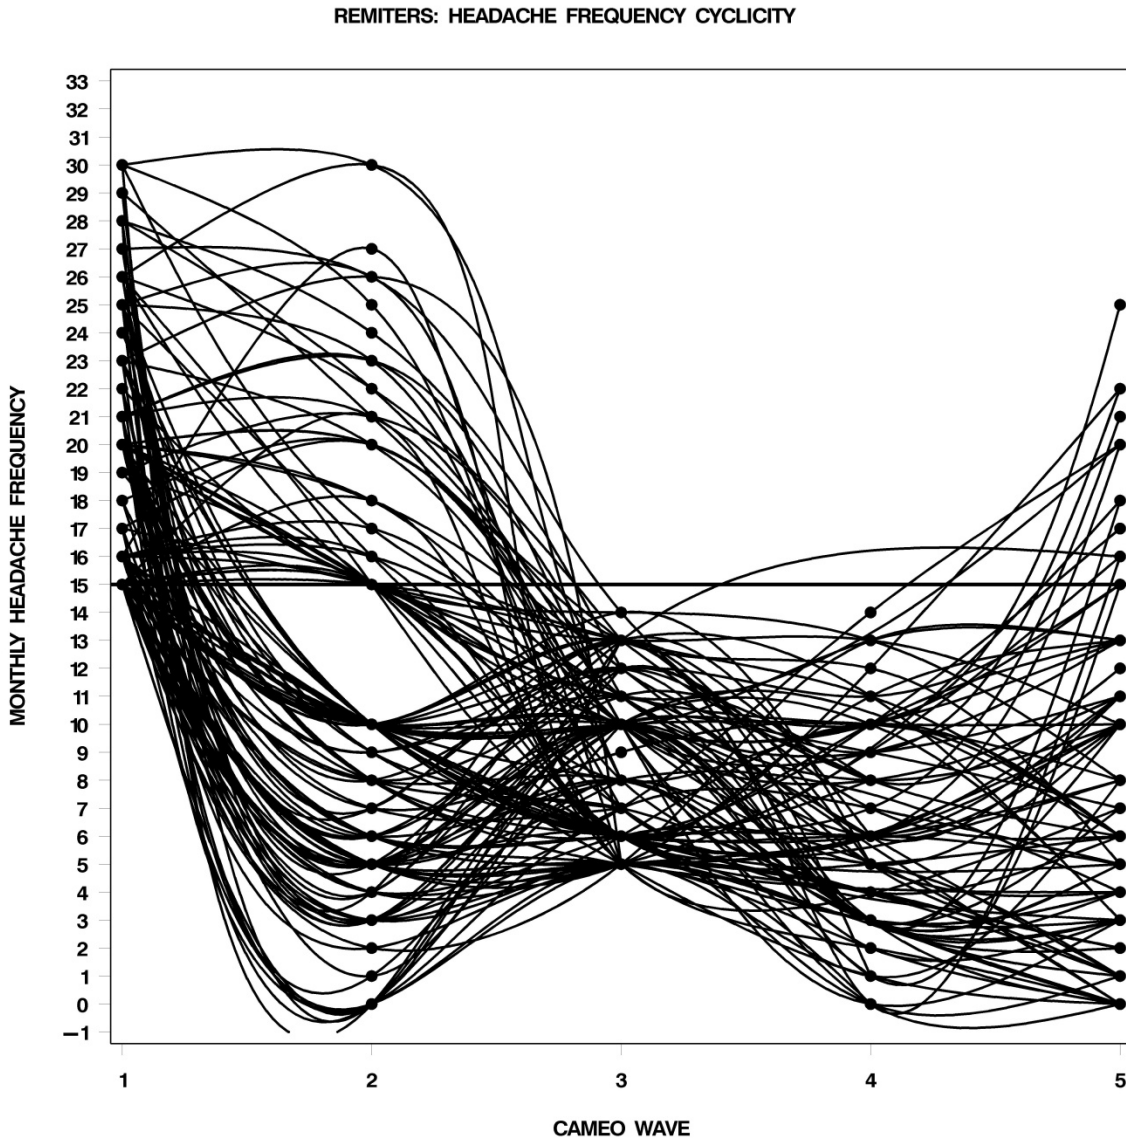

B.

### HEADACHE FREQUENCY CYCLICITY

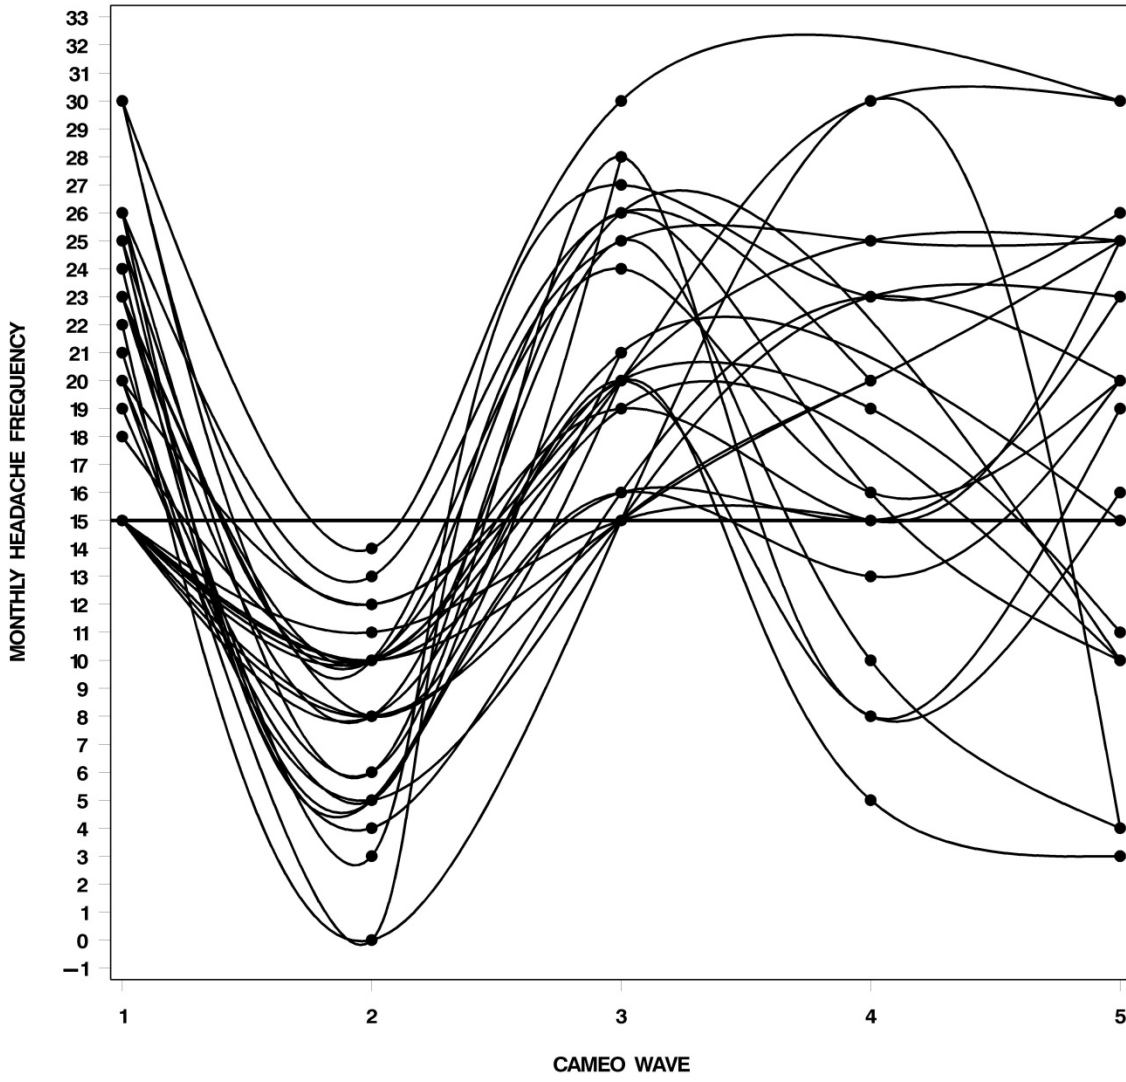

C.

### HEADACHE FREQUENCY CYCLICITY

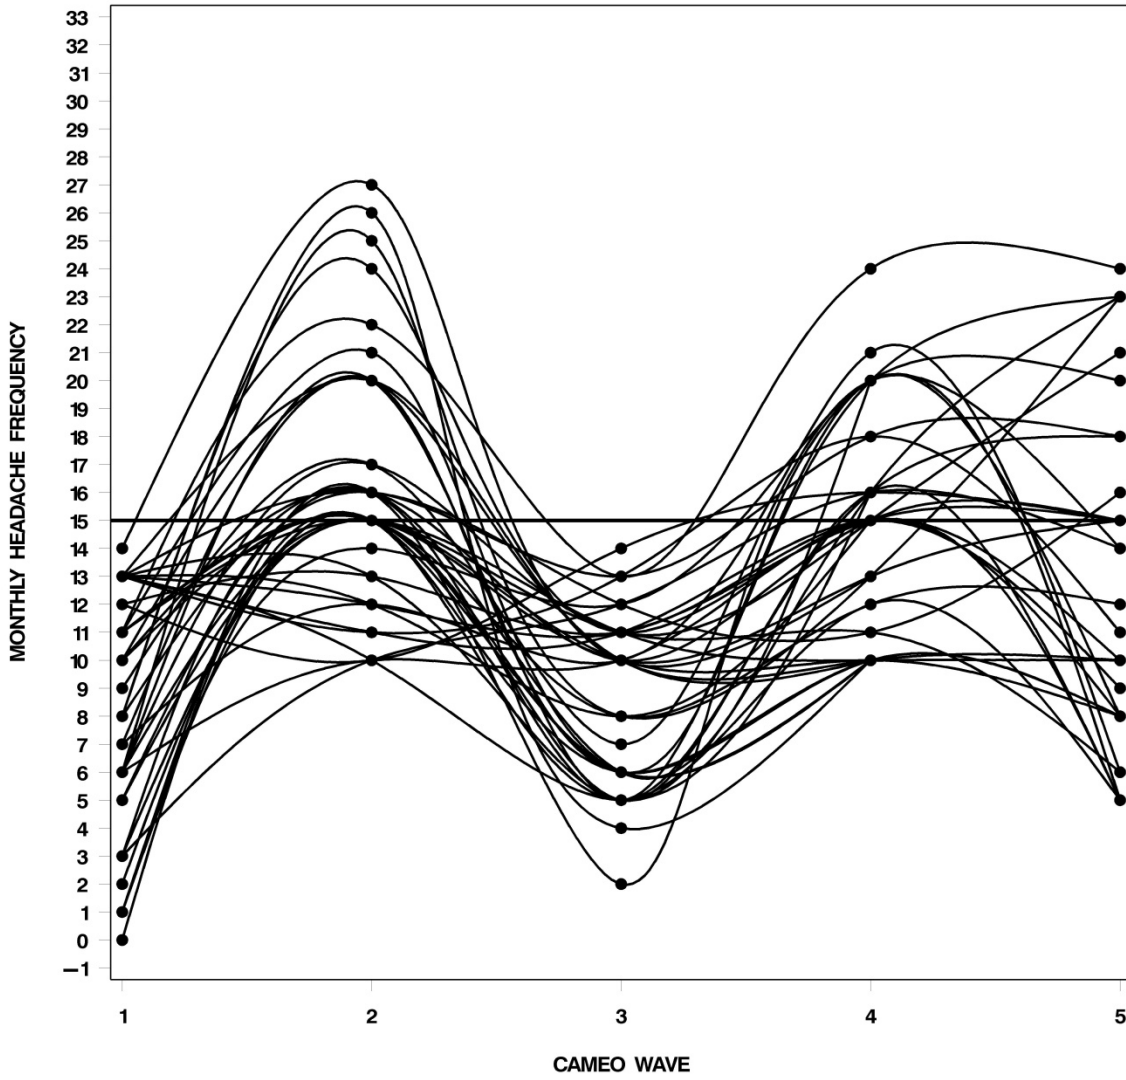

Supplement: 10194_2017_787_MOESM1_ESM.pdf [file 10194_2017_787_MOESM1_ESM.pdf]
